# Supplementary material
Source: Springer Nature journal article supplement (https://www.springermedizin.de/resource/supplementary/12889_2011_3515_MOESM1_ESM.pdf/9489256)

10 yr percent weight change

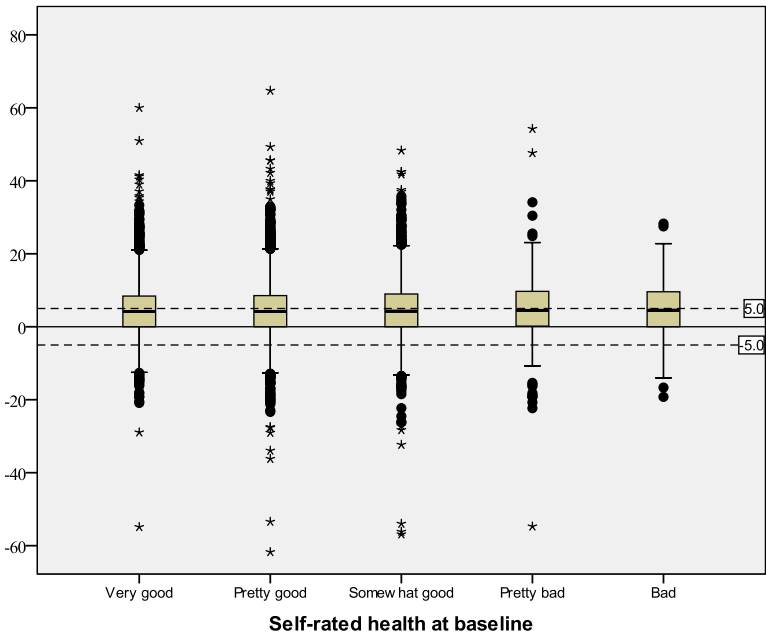

Supplement: MOESM1 [file 9489256]
